# Supplementary material for: Selection and Evaluation of Tissue Specific Reference Genes in Lucilia sericata during an Immune Challenge
Source: PubMed Central journal article supplement (PMC4529112; doi:10.1371/journal.pone.0135093), 2015-08-07

**18S ribosomal RNA**

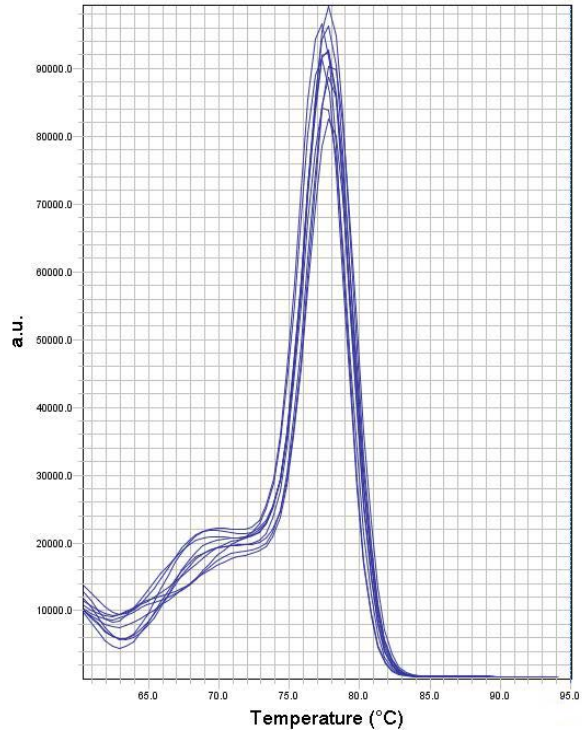

**28S ribosomal RNA**

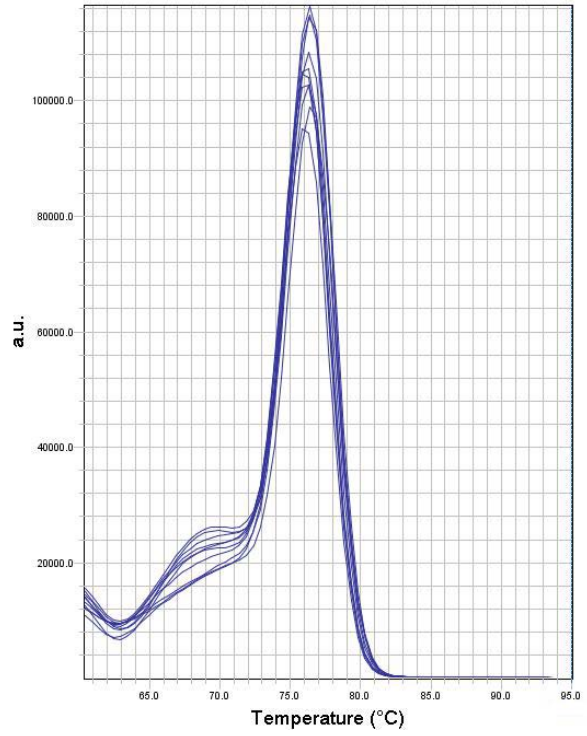

**40S ribosomal protein S3**

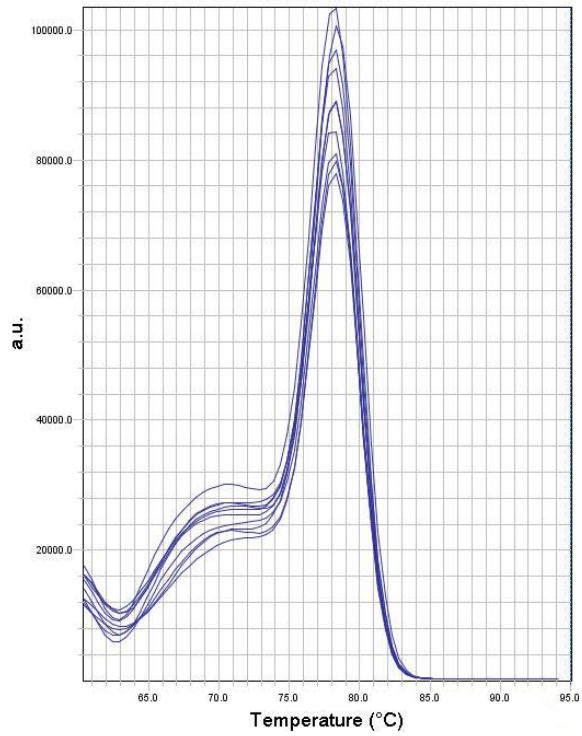

**Elongation factor 1-alpha 1**

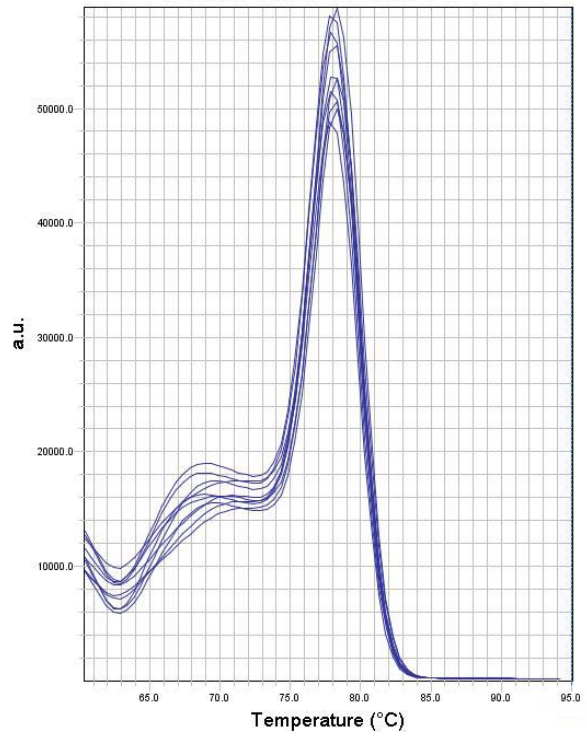

**60S acidic ribosomal protein P0**

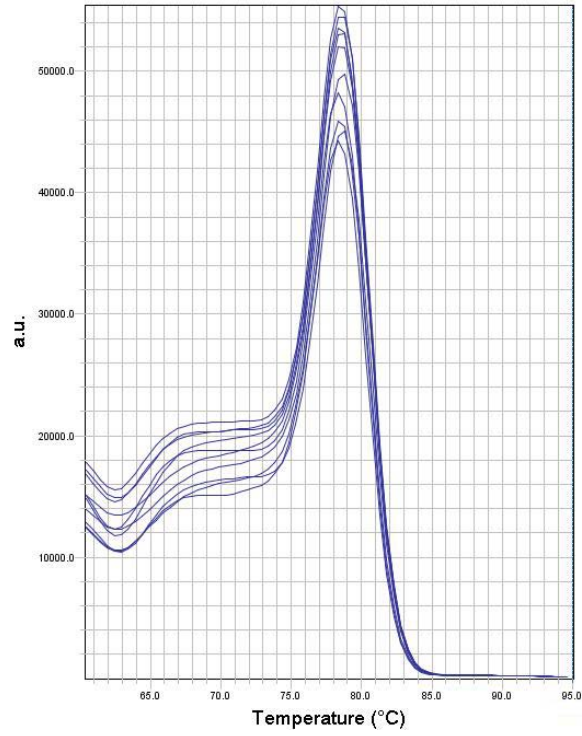

**actin**

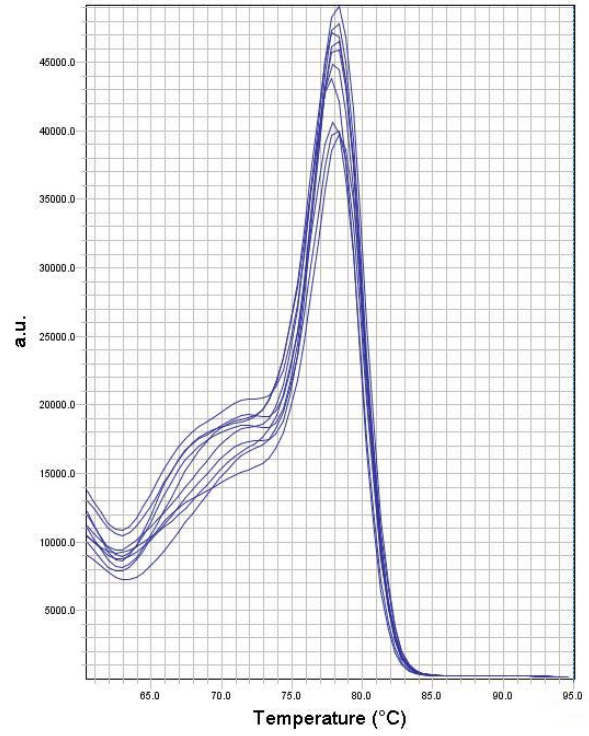

**Beta-1-tubulin**

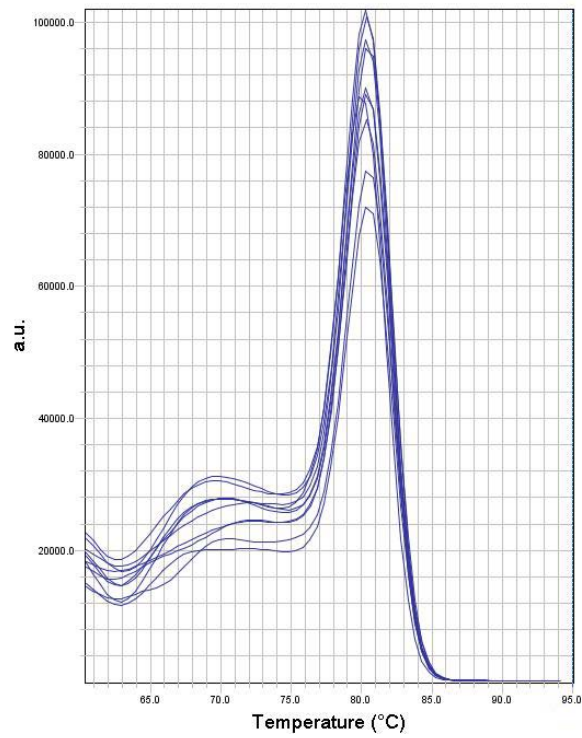

**cAMP-dependent protein kinase**

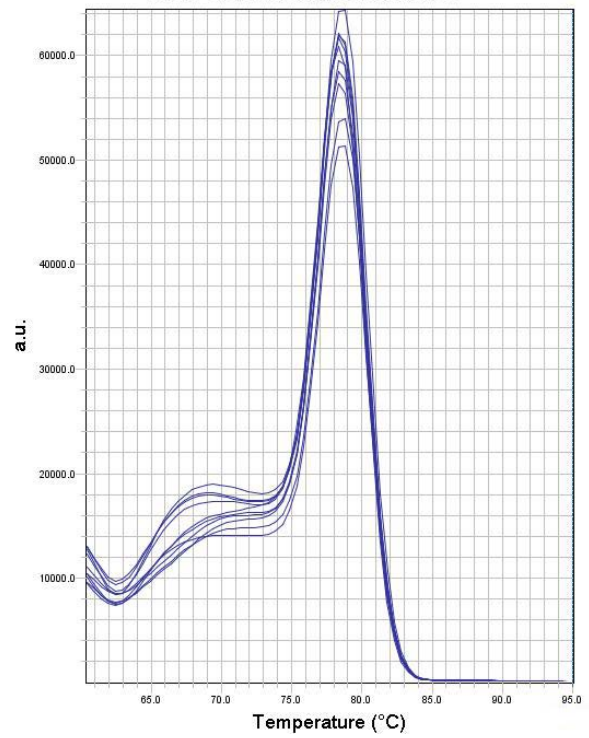

*Glyceraldehyde-3-phosphate dehydrogenase 1*

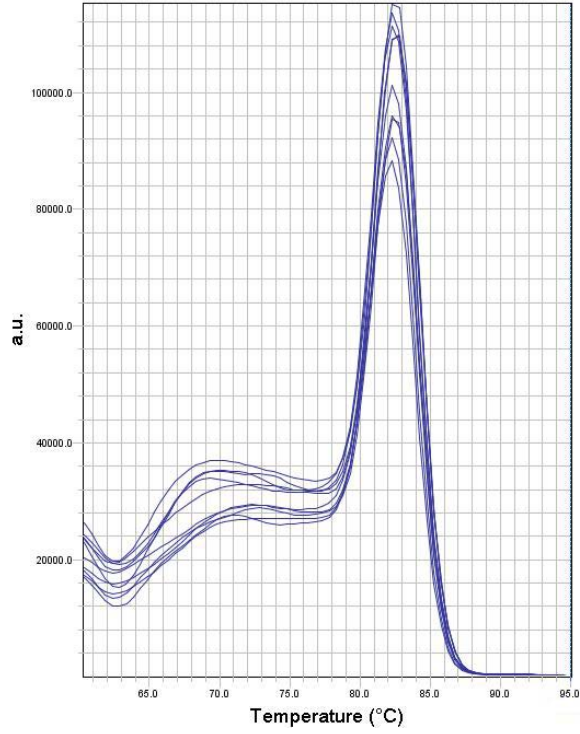

*Glutathione S-transferases 1-1*

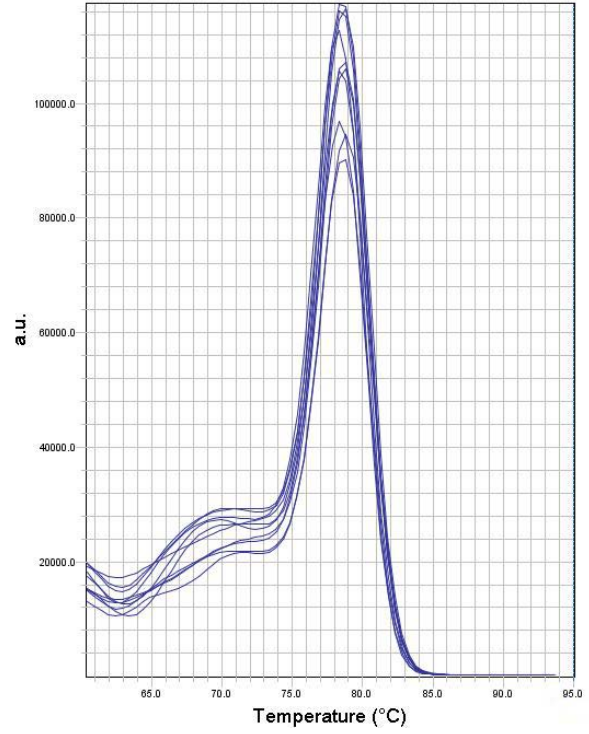

*attacin-2*

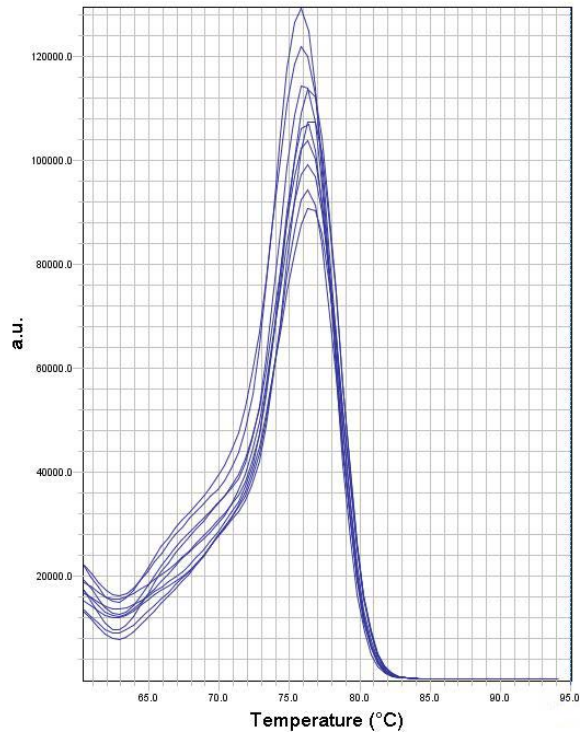

*defensin-1*

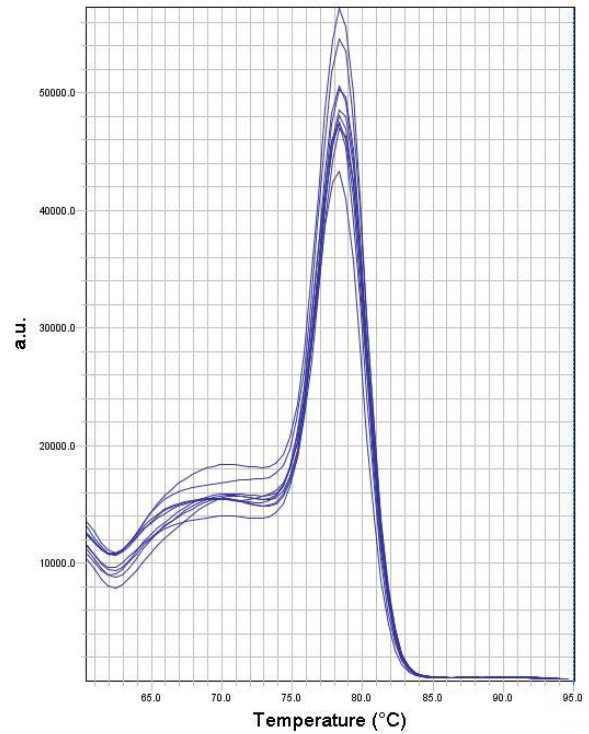

*lucimycin*

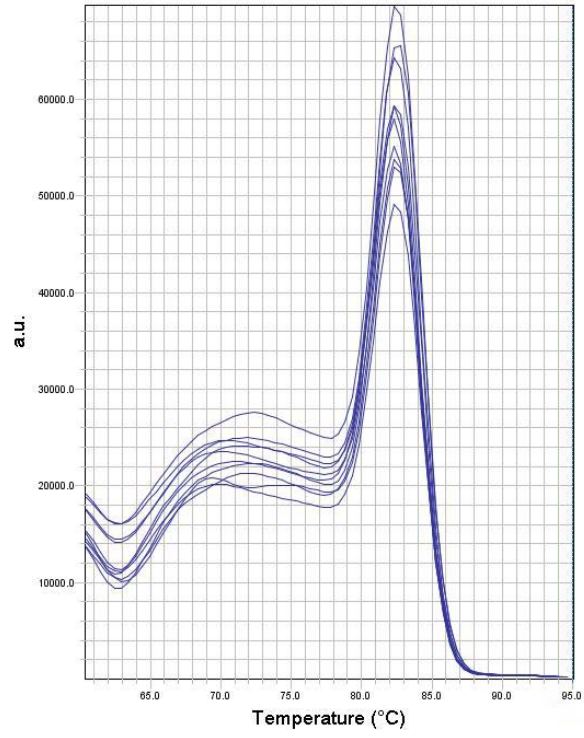

Supplement: pone.0135093.s002.pdf [file pone.0135093.s002.pdf]
